# Supplementary material
Source: PubMed Central journal article supplement (PMC5770765)
Supplement: npp2017220x1.pdf [file npp2017220x1.pdf]

## SUPPLEMENTARY FIGURES

**Title:** PTSD blood transcriptome mega-analysis:  
Shared inflammatory pathways across biological sex and modes of trauma

**Authors:** Michael S. Breen,<sup>1,2\*</sup> Daniel S. Tylee,<sup>3</sup> Adam X. Maihofer<sup>4</sup>,  
Thomas C. Neylan<sup>5,6</sup>, Divya Mehta<sup>7</sup>, Elizabeth Binder<sup>8,9</sup>, Sharon D. Chandler<sup>4</sup>,  
Jonathan L. Hess<sup>3</sup>, William S. Kremen<sup>4,10</sup>, Victoria B. Risbrough<sup>4,10</sup>, Christopher H.  
Woelk<sup>11</sup>, Dewleen G. Baker<sup>4,10</sup>, Caroline M. Nievergelt<sup>4,10</sup>, Ming T. Tsuang<sup>4,10</sup>,  
Joseph D. Buxbaum<sup>1,2</sup> and Stephen J. Glatt<sup>3</sup>

**Affiliations:** <sup>1</sup>Division of Psychiatric Genomics, Department of Psychiatry, Icahn School of Medicine at Mount Sinai, New York, New York, USA; <sup>2</sup>Seaver Autism Center for Research and Treatment, Icahn School of Medicine at Mount Sinai, New York, New York, USA; <sup>3</sup>Psychiatric Genetic Epidemiology & Neurobiology Laboratory (PsychGENe Lab); Departments of Psychiatry and Behavioral Sciences & Neuroscience and Physiology; SUNY Upstate Medical University; Syracuse, NY, USA; <sup>4</sup>Department of Psychiatry, University of California San Diego, California, USA; <sup>5</sup>Department of Psychiatry, University of California, San Francisco; <sup>6</sup>San Francisco Veterans Affairs Medical Center; <sup>7</sup>School of Psychology and Counseling, Faculty of Health, Queensland University of Technology, Kelvin Grove, Queensland, Australia; <sup>8</sup>Department of Translational Research in Psychiatry, Max-Planck Institute of Psychiatry, Munich, Germany; <sup>9</sup>Department of Psychiatry and Behavioral Sciences, Emory University School of Medicine, Atlanta, GA, USA; <sup>10</sup>Veterans Affairs Center of Excellence for Stress and Mental Health, San Diego, California, USA; <sup>11</sup>Clinical and Experimental Sciences, Faculty of Medicine, University of Southampton, UK.

\* To whom correspondence should be addressed:

Email: michael.breen@mssm.edu

**Supplementary Figure 1.** Multi-step analytic workflow used in the current study.

**Supplementary Figure 2.** Mega-analytic differential expression and unsupervised clustering.

**Supplementary Figure 3.** STRING protein-protein interaction (PPI) network.

**Supplementary Figure 4.** Gene and gene-ontology cross-disorder overlaps.

**Supplementary Figure 5.** WGCNA preservation analyses.

**Supplementary Figure 6.** Supervised multivariate classification results.

*For all table files, please find supplementary table file.*

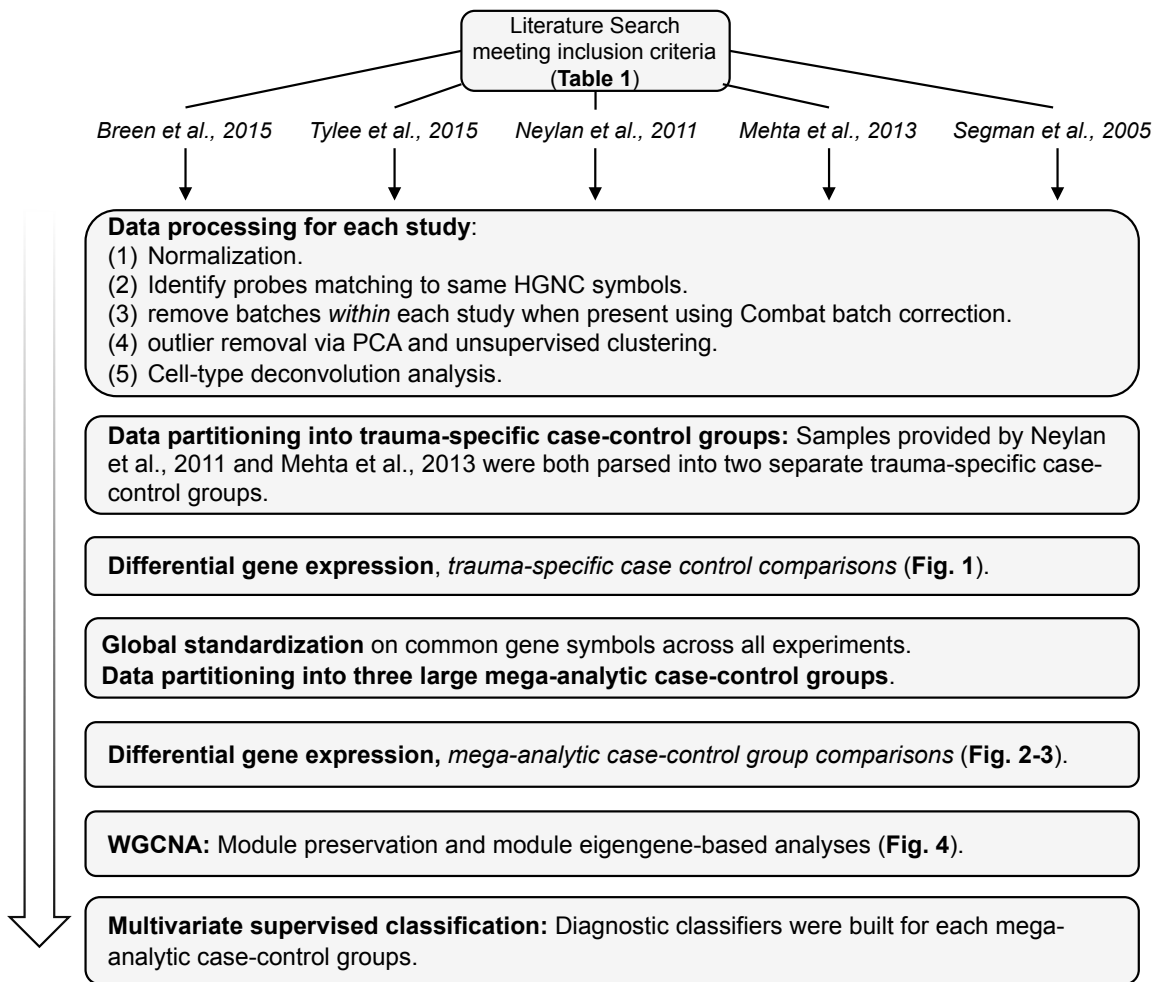

**Supplementary Figure 1.** Multi-step analytic workflow used in the current study.

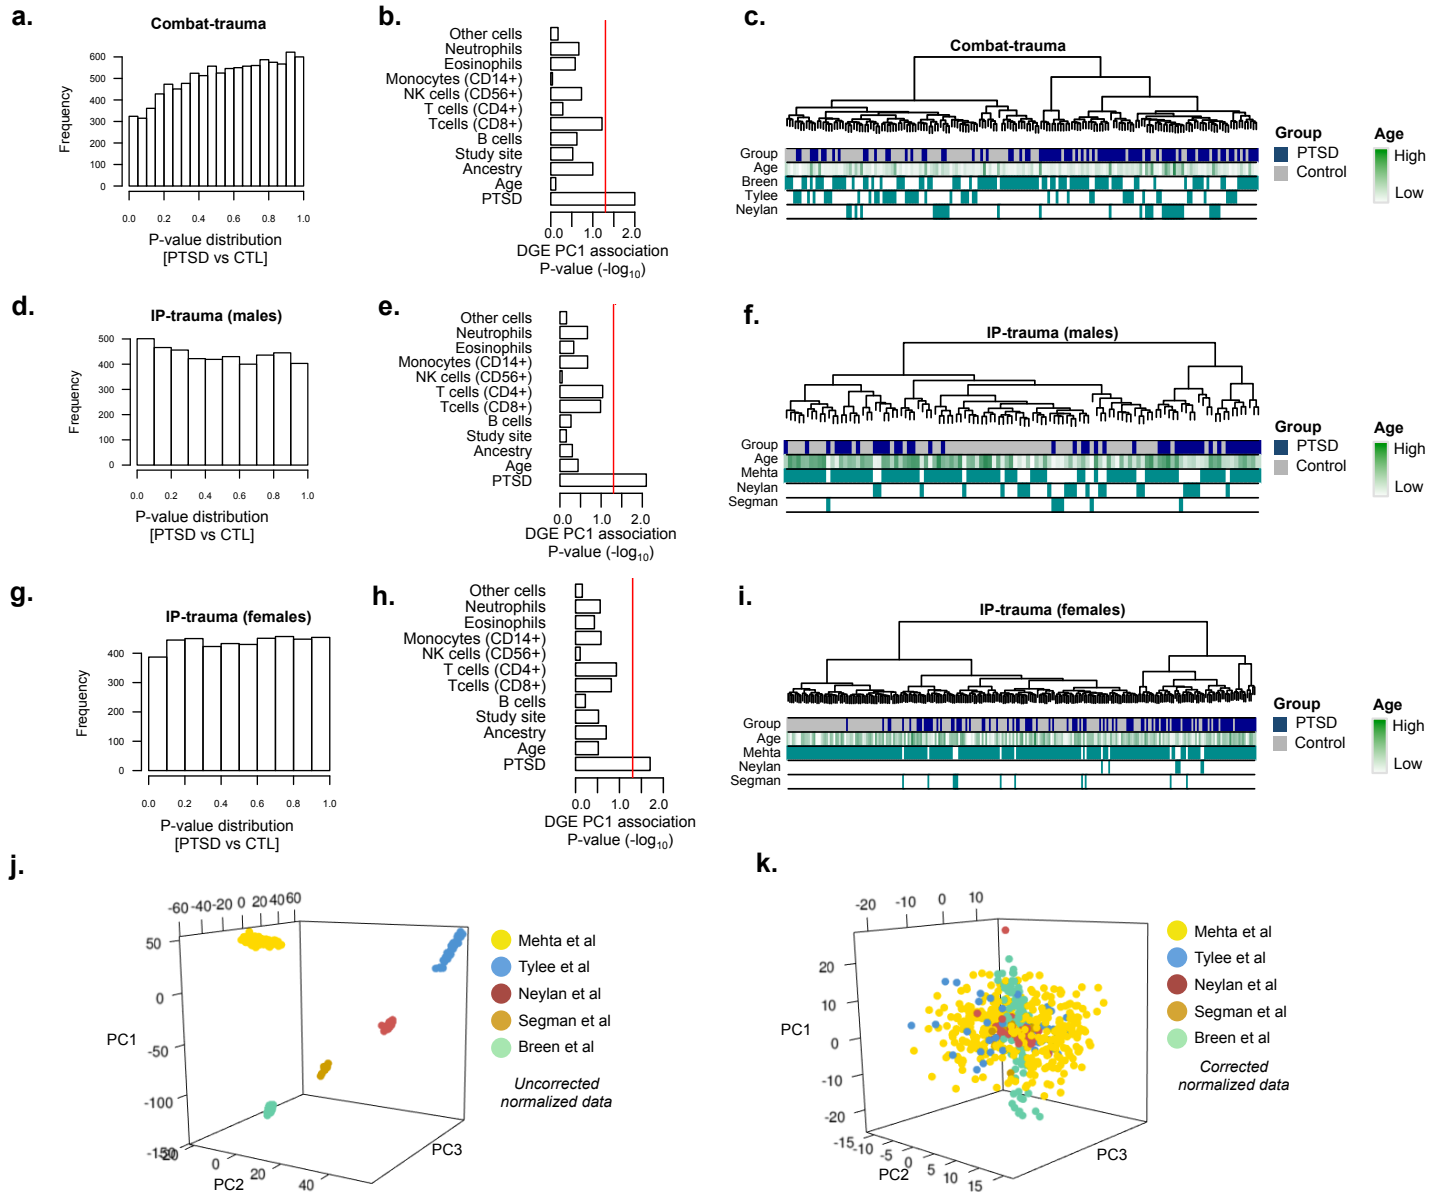

**Supplementary Figure 2.** Mega-analytic differential expression and unsupervised clustering. **(A, D, G)** Histograms of  $P$ -value distributions for each of the three mega-analytic case-control comparisons. **(B,E,H)** The first principal component of DGE signatures for each mega-analytic group are primarily associated with PTSD diagnosis, and not with age, ancestry, study site or estimated cell-type frequencies; red line indicates  $P < 0.05$ . Average linkage hierarchical clustering of the samples in each mega-analytic case-control group based on DGE signatures ( $P < 0.05$ ) identified in **(C)** PTSD males exposed to combat trauma, **(F)** PTSD males exposed to IP trauma and **(I)** PTSD females exposed to IP trauma. Principal component analysis of all available gene expression studies **(J)** prior to and **(K)** following global standardization.

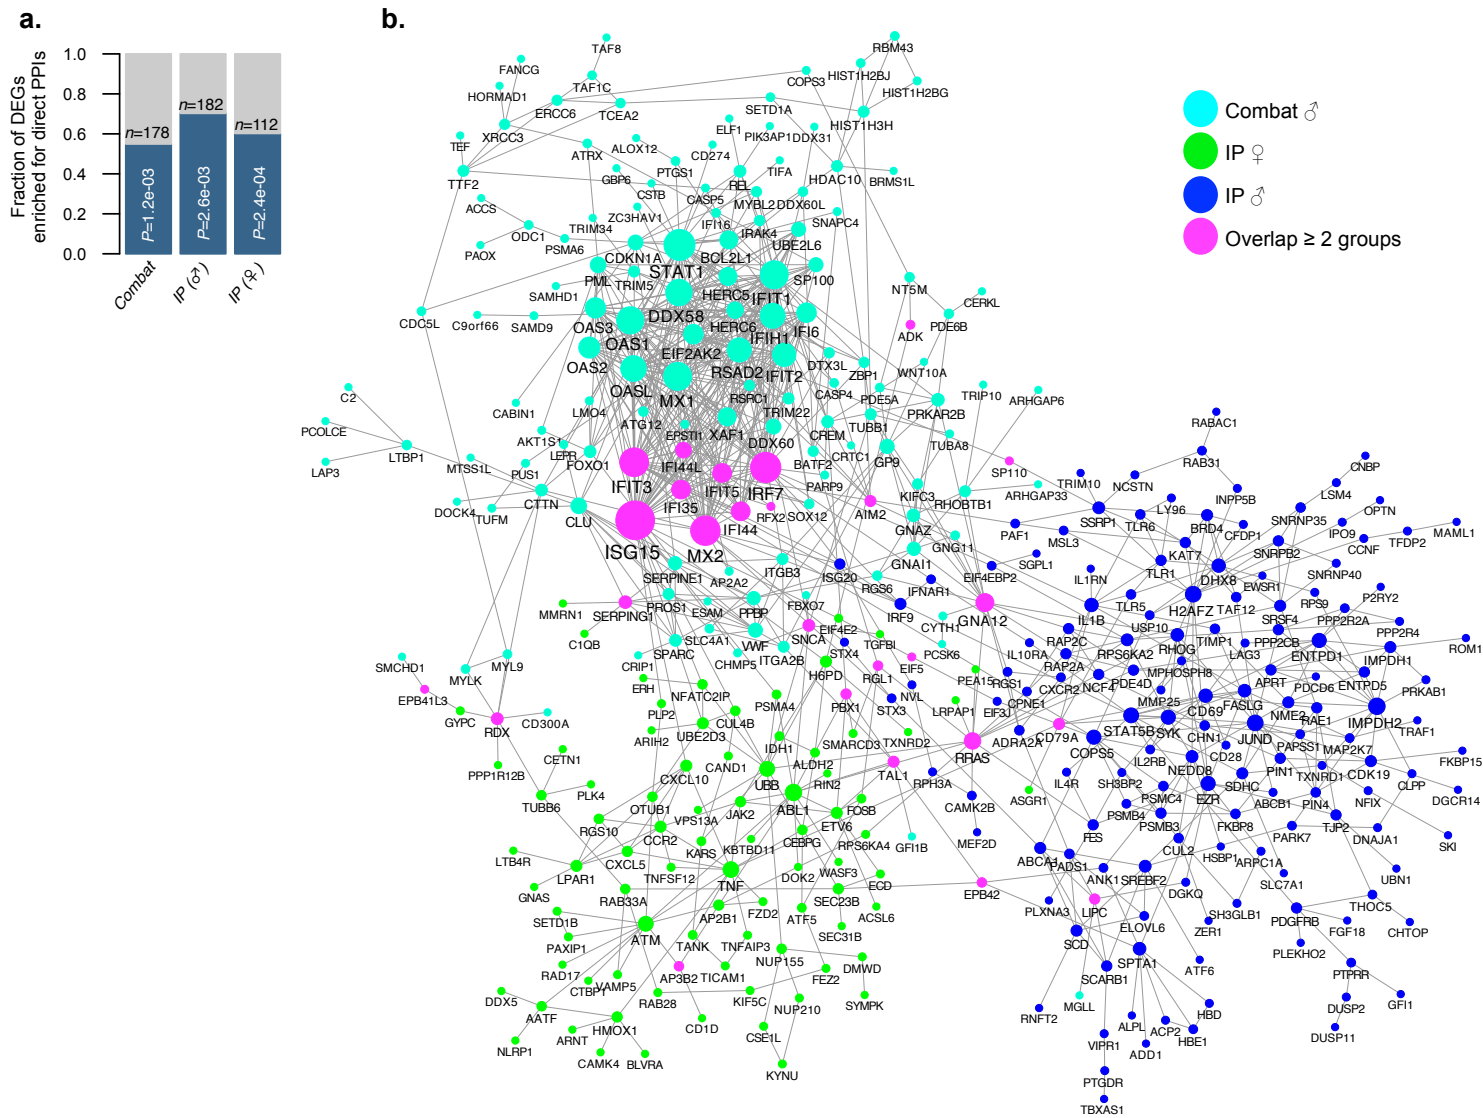

**Supplementary Figure 3.** STRING protein-protein interaction (PPI) network. **(A)** DGE lists were significantly enriched for observed direct protein-protein interactions (PPI) ( $n=178$ ,  $182$ ,  $112$ ), beyond what is expected by chance using a nontrivial random background model. **(B)** Three separate networks were constructed in Cytoscape and the union of all networks was analyzed. Larger node size indicates a larger set of degrees (connections) with protein neighbors. Colored nodes indicate: cyan, males exposed to combat-related traumas; green, males exposed to IP-related traumas; blue, females exposed to IP-related traumas; pink, nodes shared between 2 or more networks.

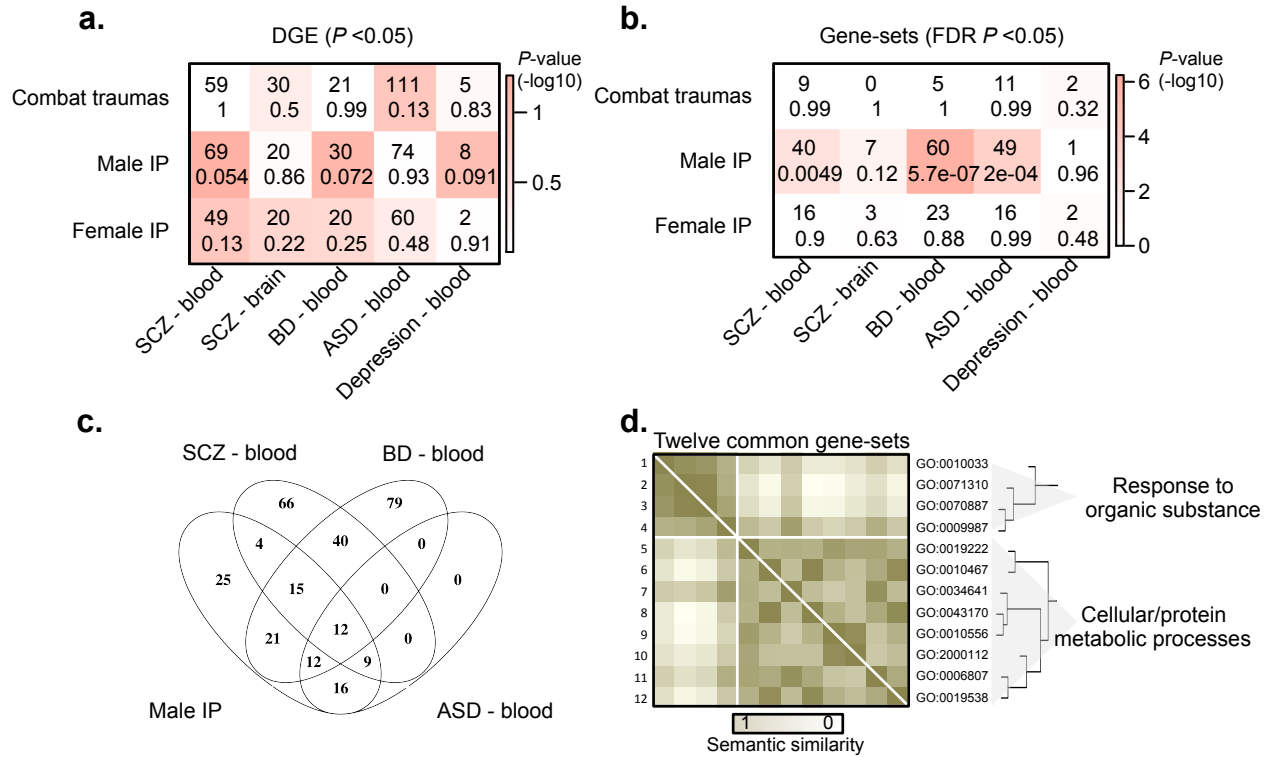

**Supplementary Figure 4.** Cross-disorder overlap of mega-analysis derived differential gene expression signatures. **(A)** PTSD gene expression signatures ( $P < 0.05$ ) in this study are overlapped with those found in other large-scale mega-analyses, including schizophrenia (SCZ) peripheral blood and postmortem brain tissue, bipolar (BD) peripheral blood and autism spectrum disorder (ASD) peripheral blood. **(B)** Overlap at the gene-ontology (GO) level, for significantly altered biological processes (FDR  $P < 0.05$ ). The top number in each cell represents the number of overlapping genes while the bottom number represents the corresponding  $P$ -value significance determined by a one-sided Fisher's exact test. Cells are shaded by level of significance. **(C)** Venn diagram of gene-sets between PTSD males exposed to IP, SCZ, BD and ASD. **(D)** Semantic similarity scores for twelve common GO pairs clustered by hierarchical clustering method (left) and common ancestor terms (right).

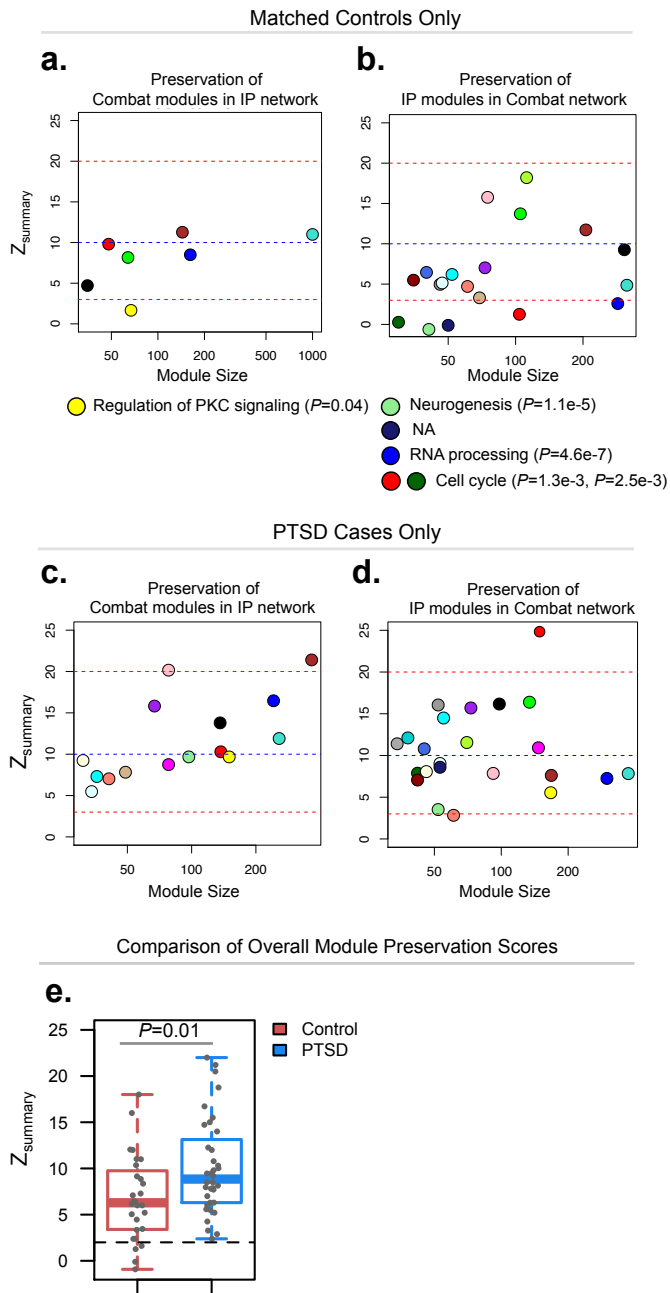

**Supplementary Figure 5.** WGCNA preservation analyses. Module preservation assessed co-regulatory patterns in control individuals exposed to **(A)** combat-trauma relative to IP-related traumas and **(B)** IP-related traumas relative to combat-related trauma. Similarly, co-regulatory patterns were assessed in PTSD cases exposed to **(C)** combat-trauma relative to IP-related traumas and **(D)** IP-related traumas relative to combat-related traumas. **(E)** We then assessed whether different traumatic backgrounds (that is, combat or IP traumas) effect co-regulatory patterns in control individuals differently than in PTSD cases. Collectively, when comparing the  $Z_{\text{summary}}$  scores computed within control individuals **(A-B)** to  $Z_{\text{summary}}$  scores computed within PTSD cases **(C-D)** significantly less preservation was observed in controls relative to PTSD cases ( $P=0.01$ ; Wilcox Test) indicating a more heterogenous response to trauma within control individuals compared to PTSD cases. The top ranked FDR corrected  $P < 0.05$  GO-term is reported for each module with  $Z_{\text{summary}} < 2$ . For complete lists of genes within each module see **Supplementary Table 4**.

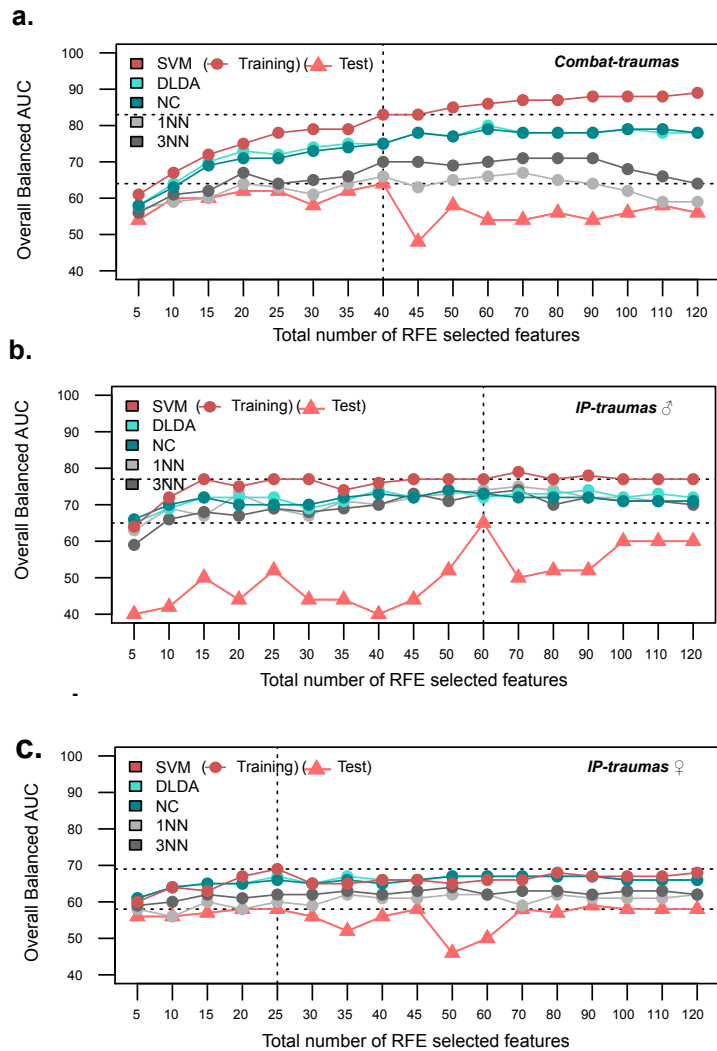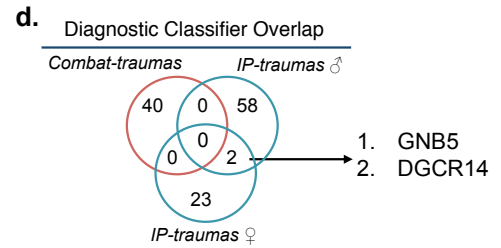

**Supplementary Figure 6.** Supervised multivariate classification results. Five best-in-class machine-learning algorithms were applied to distinguish (A) PTSD males from controls exposed to combat trauma, (B) PTSD males from control individuals composed to IP-related traumas and (C) PTSD females from controls exposed to IP traumas using a nested leave-one-tenth out cross-validation approach. Recursive feature elimination (RFE) was used to select the top most informative features on the training data (70%) and iteratively worked down to the 5 most informative features, while testing prediction accuracies on completely withheld test data (30%). RFE selected features (x-axis) is plotted against overall balanced accuracy (AUC; y-axis) for each mega-analytical comparison. (D) Overlap of final gene classifiers identified 2 genes in common across males and females exposed to IP-traumas (GNB5 and DGCR14).
